# Supplementary material for: A smart electrolyte-replenishing semi-dry electrode based on a temperature-responsive hydrogel for sustainable electrophysiological signal acquisition
Source: Royal Society of Chemistry journal article supplement (doi:10.1039/d4tc02801e), 2024-01-01
Supplement: d4tc02801e1.pdf [file d4tc02801e1.pdf]

## *Supporting Information*

# **A smart electrolyte-replenishing semi-dry electrode based on a temperature-responsive hydrogel for sustainable electrophysiological signal acquisition**

Yiming Cai<sup>a</sup>, Fushuai Wang<sup>a</sup>, Lang Yang<sup>c</sup>, Lin Chen<sup>c</sup>, Jialei Ying<sup>b</sup>, Zhenzhong Liu<sup>b</sup>, Guozheng Wang<sup>b,d</sup>, Chunxin Ma<sup>b,c</sup> and Jun Liu<sup>a,c,\*</sup>

*a. Key Laboratory for Biomedical Engineering of Education Ministry, Department of Biomedical Engineering, Zhejiang University, Hangzhou, 310027, China*

*b. Taizhou Key Laboratory of Medical Devices and Advanced Materials, Taizhou Institute of Zhejiang University, Taizhou 318000, China*

*c. State Key Laboratory of Marine Resource Utilization in South China Sea, School of Chemistry and Chemical Engineering, Hainan University, Haikou 570228, China*

*d. Department of Sports Science, College of Education, Zhejiang University, Hangzhou 310058, China*

## Supporting Figures

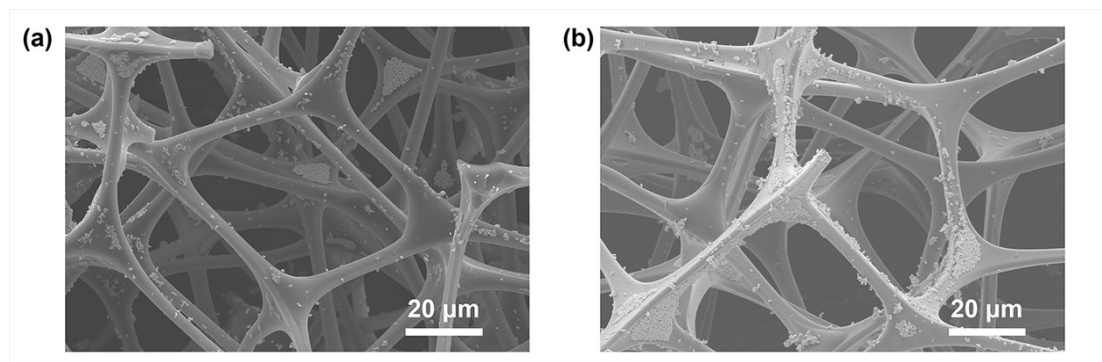

**Figure S1.** The SEM images of rare sponge immersed in (a) 10% Ag nanoparticles dispersion and (b) 30% Ag nanoparticles dispersion.

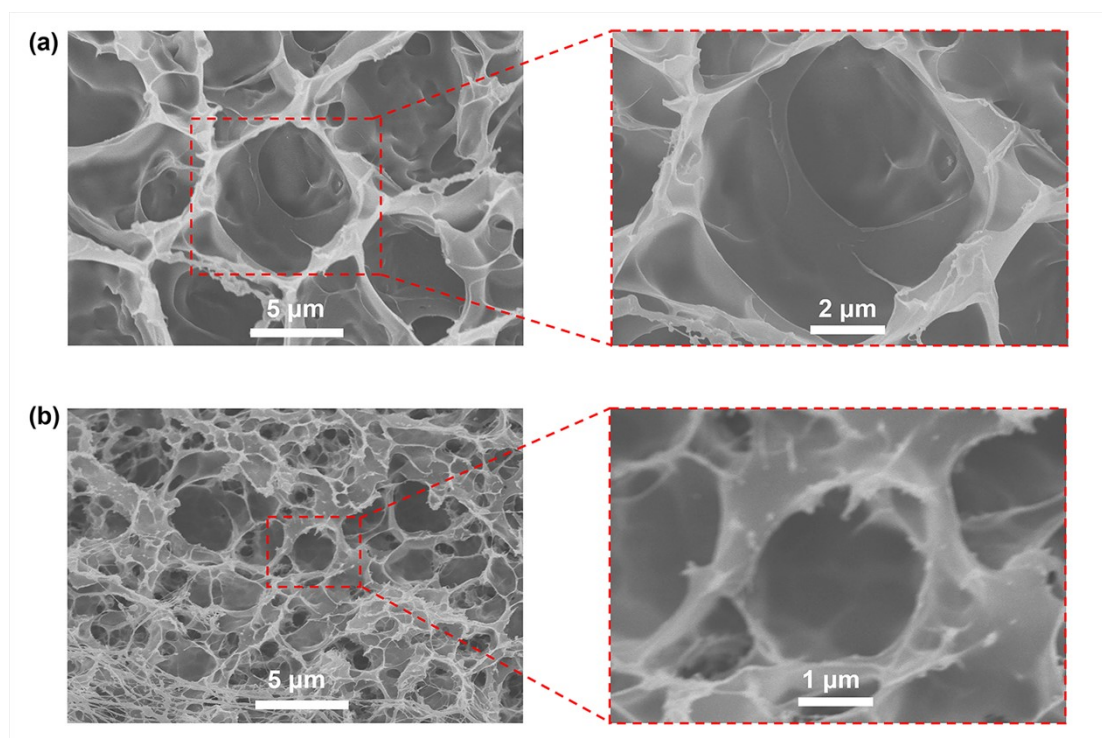

**Figure S2.** The SEM images of (a) PNIPAM hydrogel and (b) PNIPAM/PVA hydrogel.

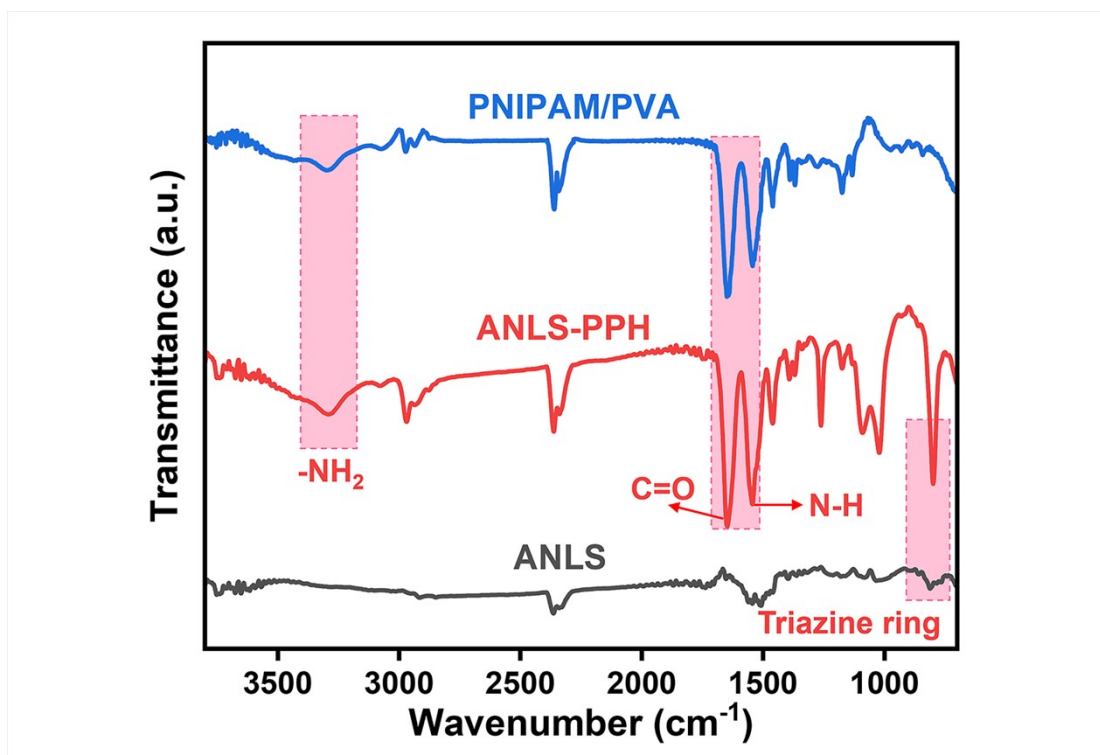

**Figure S3.** The FT-IR spectra of ANLS, PNIPAM/PVA hydrogel and ANLS-PPH.

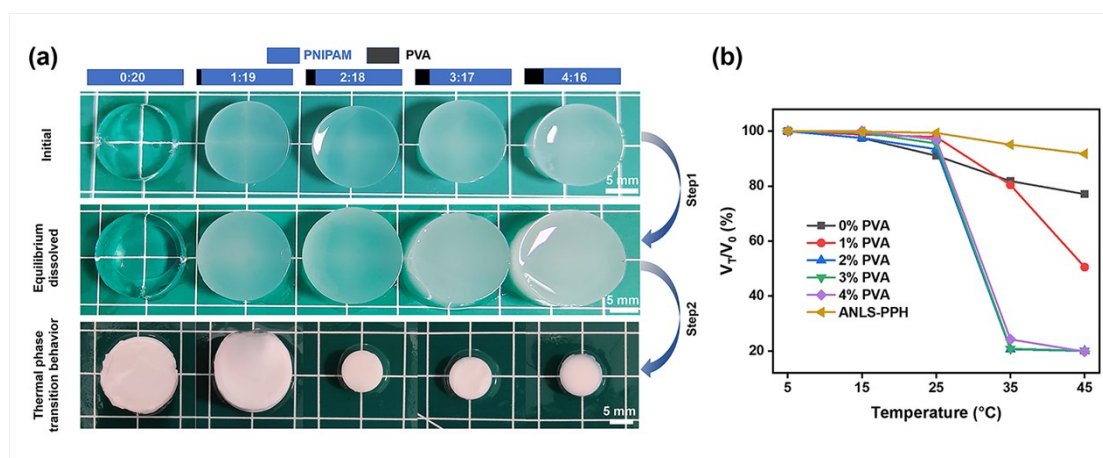

**Figure S4.** (a) Photographs of hydrogels with different PNIPAM and PVA contents in the original, full swelling and thermal phase transition behavior form. (b) Volume change curves of ANLS-PPH and hydrogels with different PNIPAM and PVA contents under temperature change.

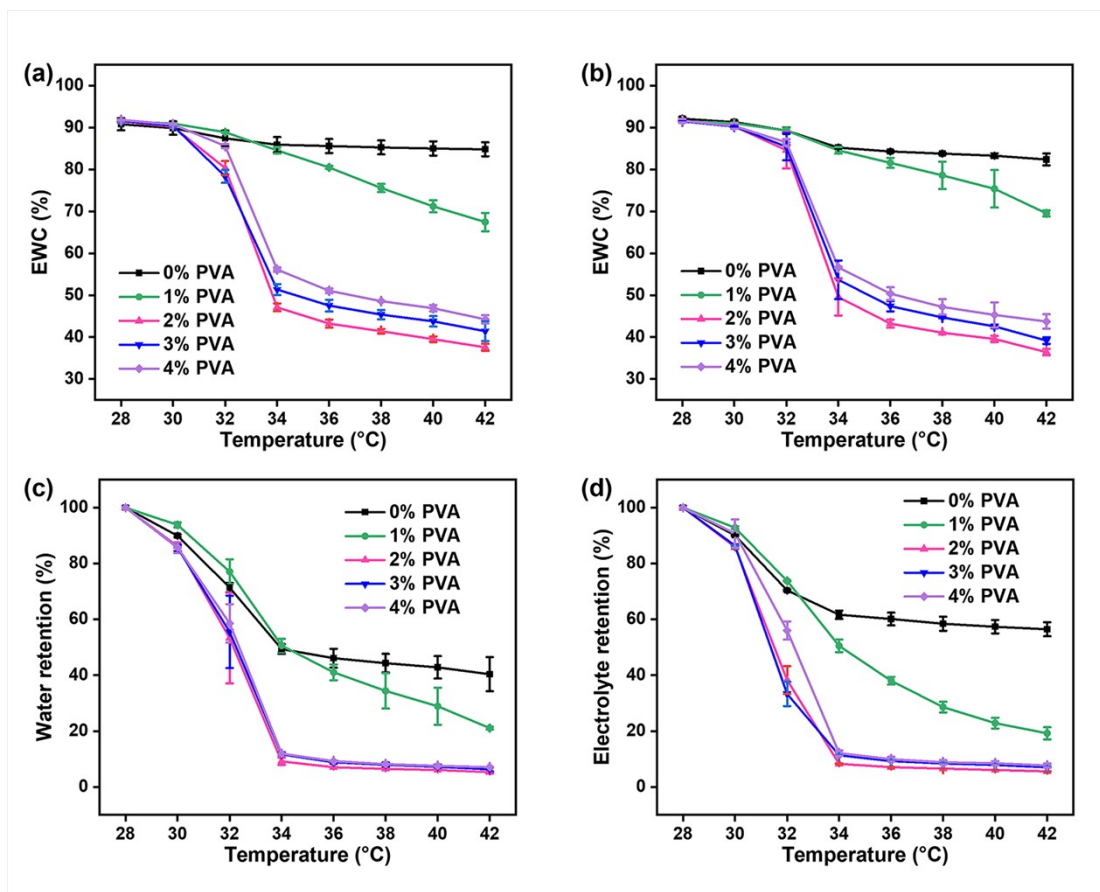

**Figure S5.** Equilibrium water content-temperature curves of hydrogels with different PVA contents in (a) deionized water and (b) 0.2 mol/L NaCl. Water retention-temperature curves of hydrogels with different PVA contents in (c) deionized water and (d) 0.2 mol/L NaCl.

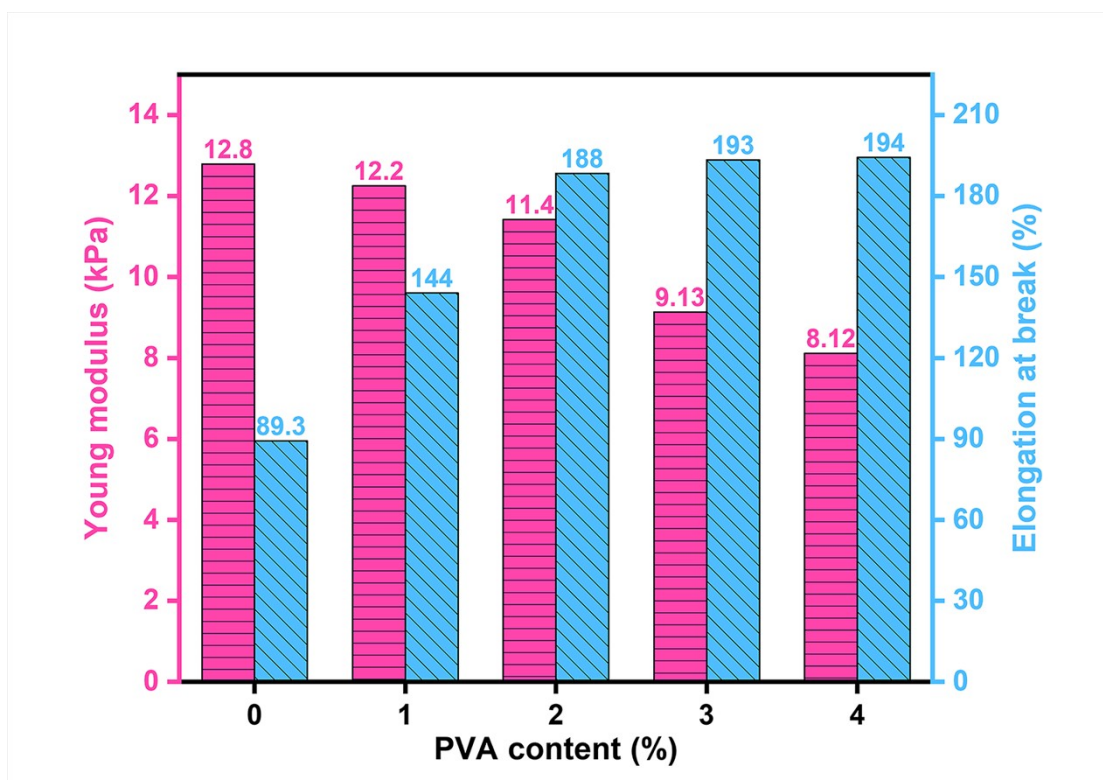

**Figure S6.** Comparison of the tensile strengths of hydrogels with different PVA contents.

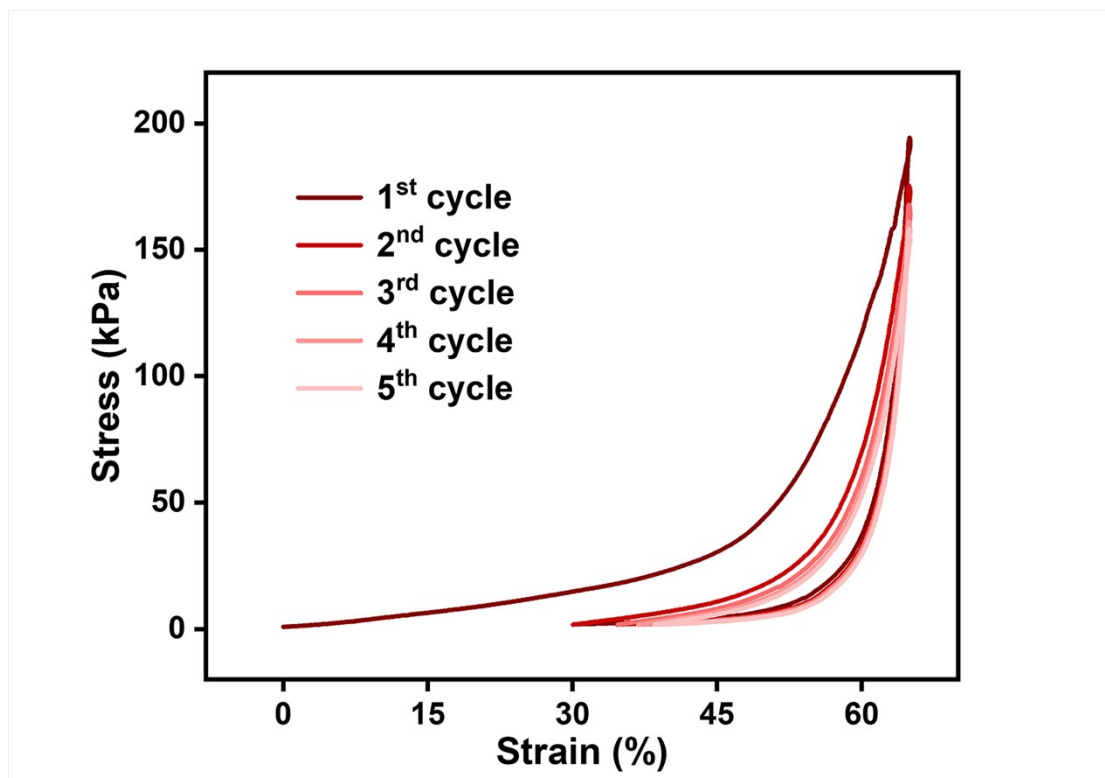

**Figure S7.** Cyclic compression loading-unloading curves of ANLS-PPH with different cycle times at the same strain.

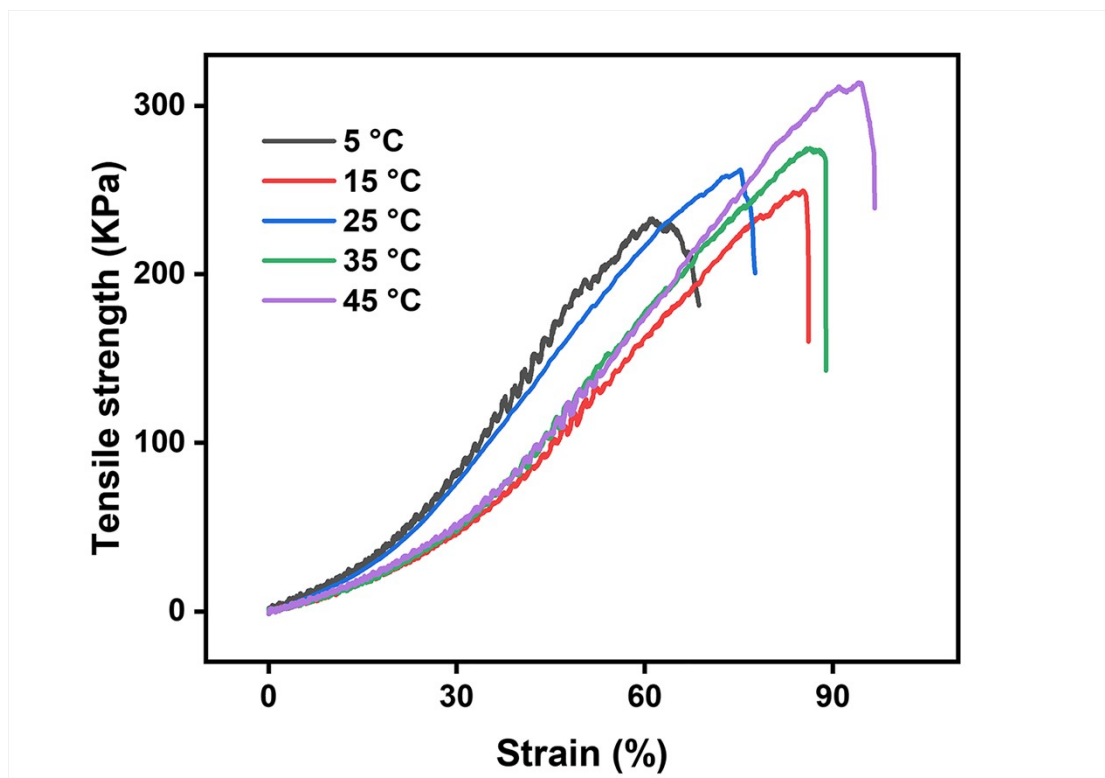

**Figure S8.** Comparison of tensile strength of ANLS-PPH at different temperatures.



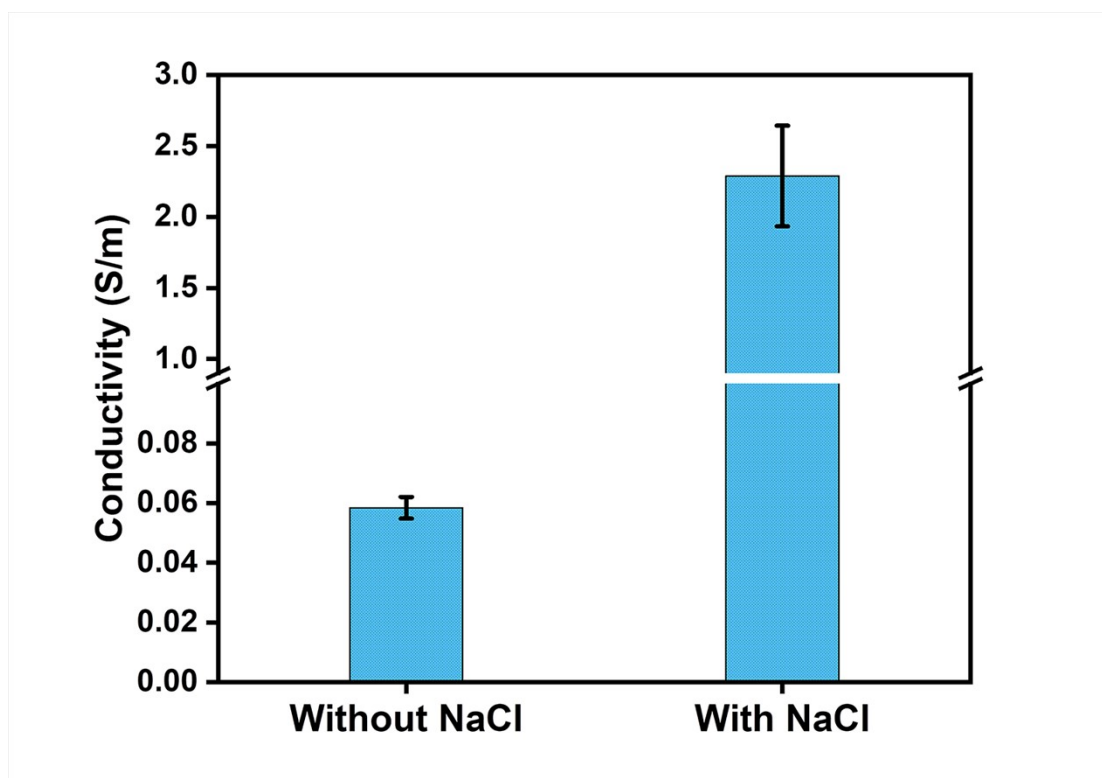

**Figure S9.** The conductivity for ANLS-PPH without NaCl and with NaCl.

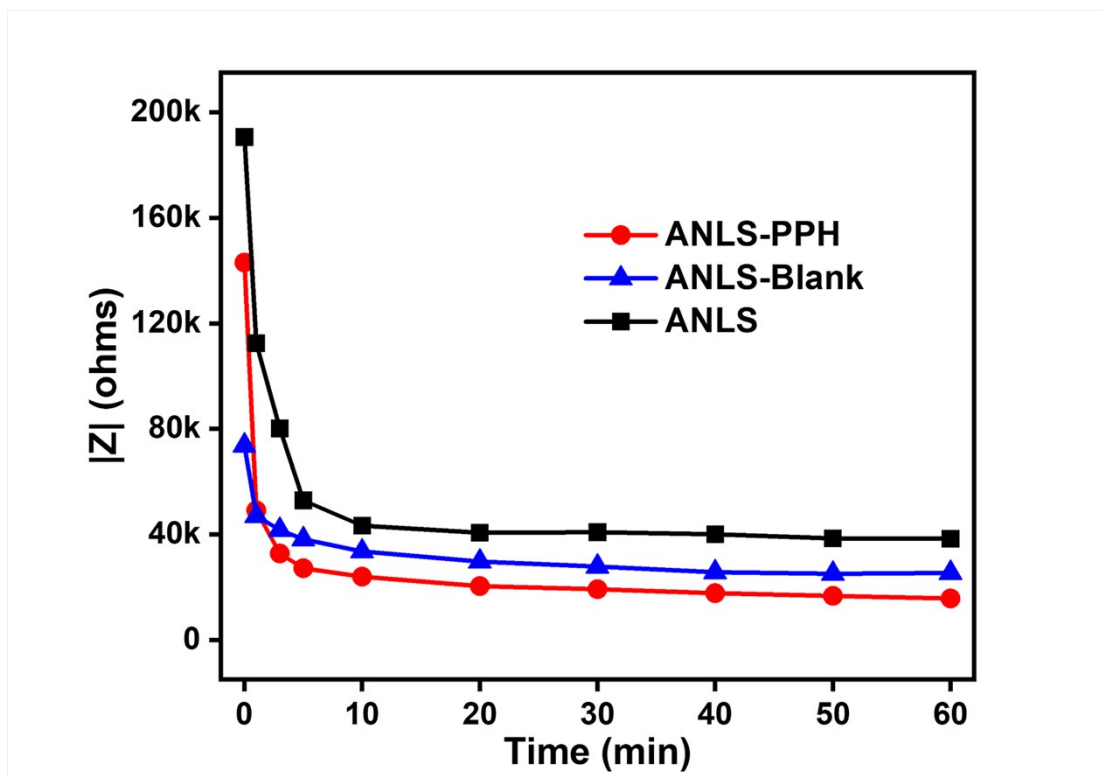

**Figure S10.** The skin-electrode contact impedance between the ANLS, ANLS-Blank and ANLS-PPH over 1 h.

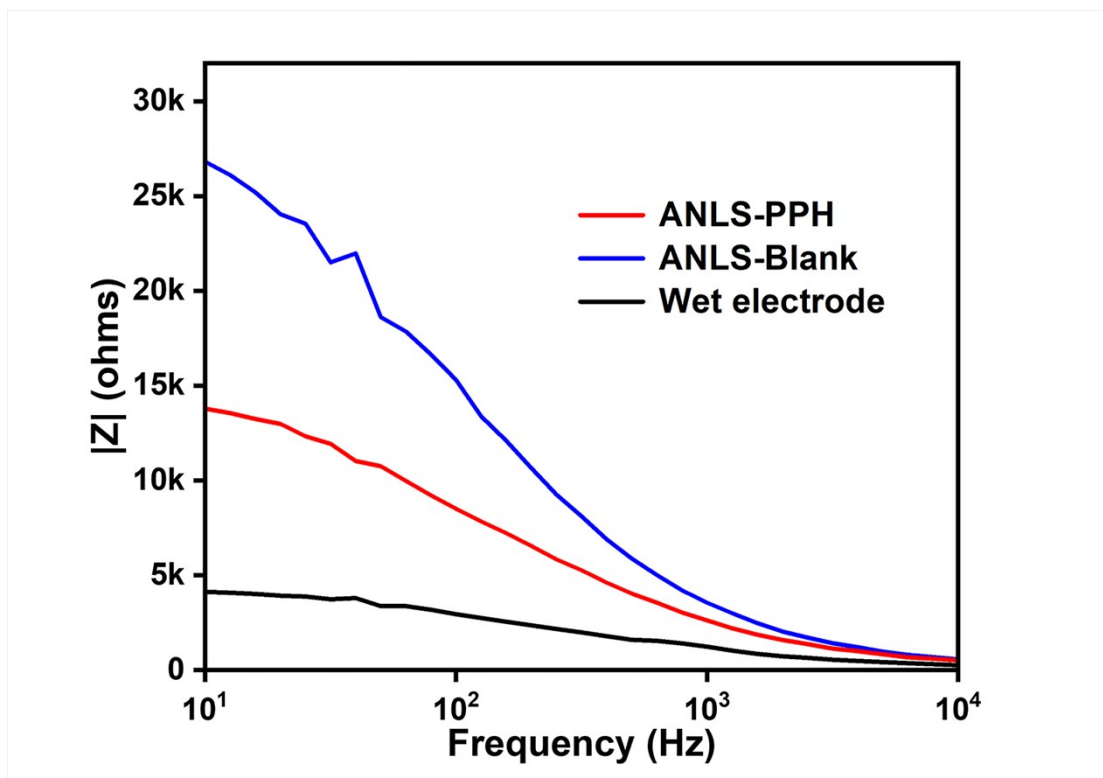

**Figure S11.** The mean skin-electrode contact impedance spectra of different subjects with ANLS-PPH, ANLS-Blank and wet electrodes.

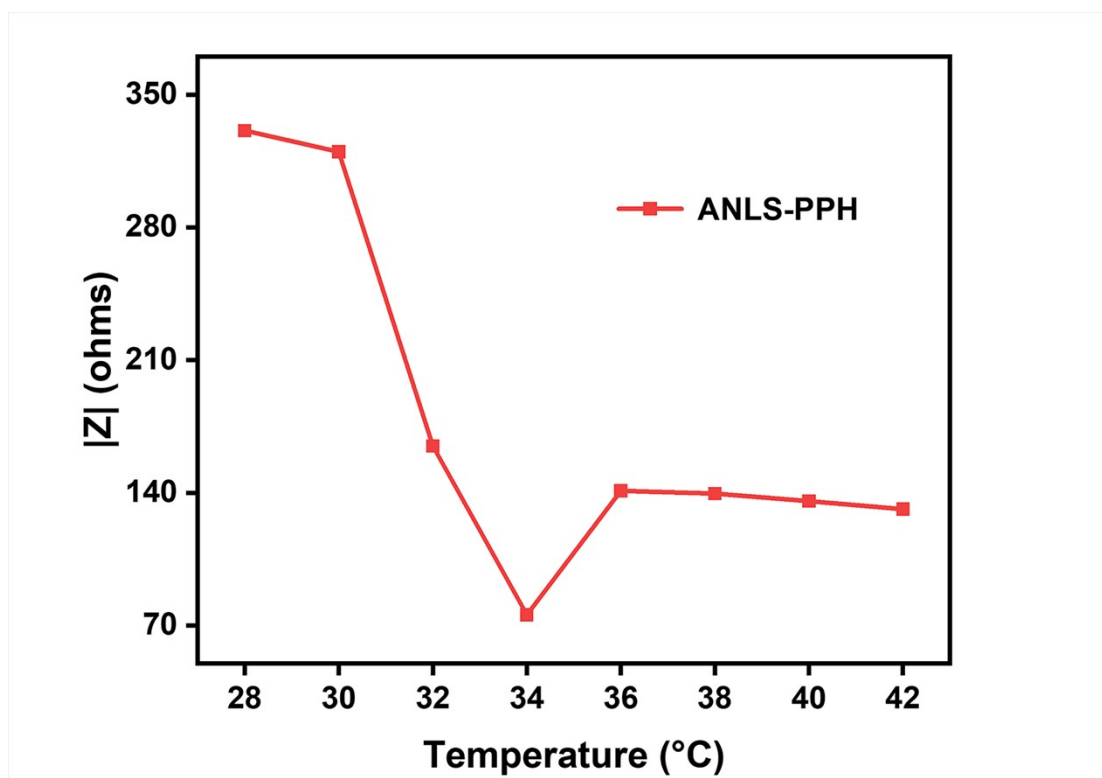

**Figure S12.** The impedance of ANLS-PPH electrode pairs at different temperatures

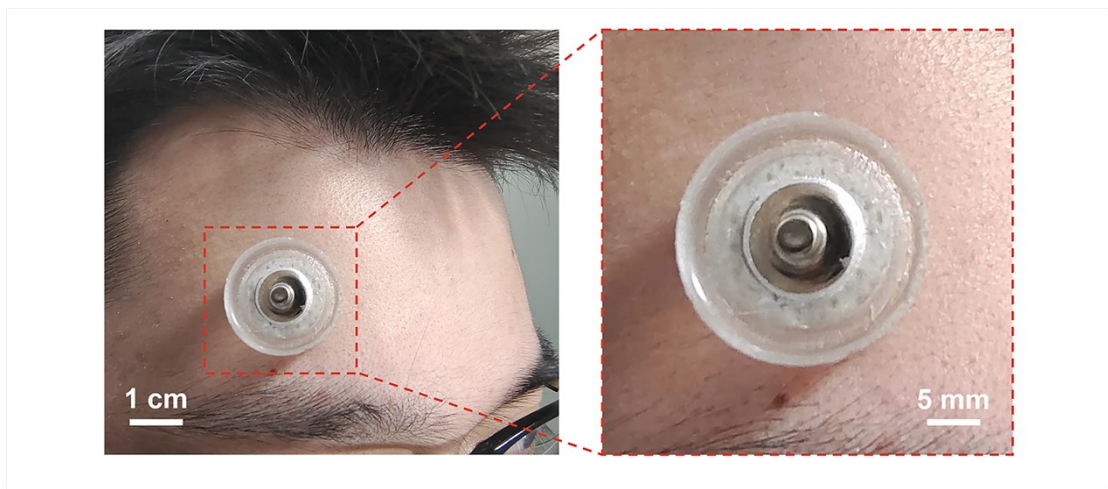

**Figure S13.** Photographs of the semi-dry electrode located on forehead.

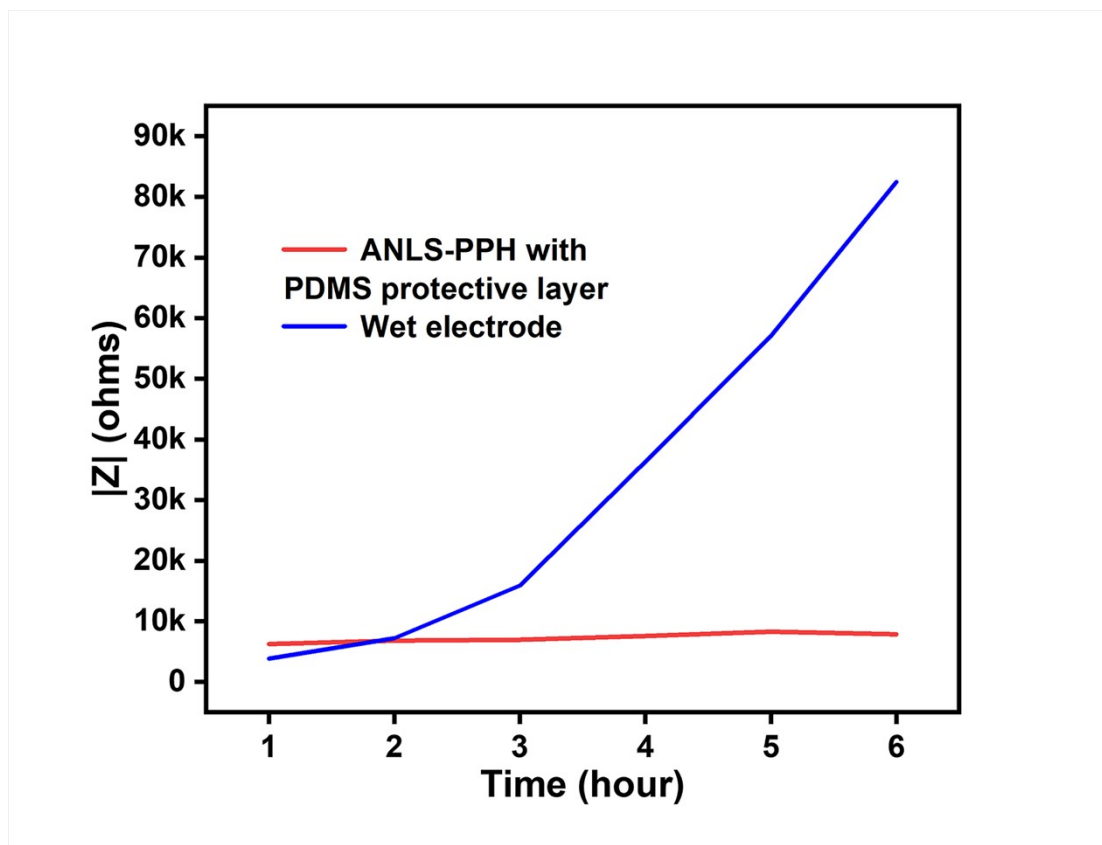

**Figure S14.** Impedance data for semi-dry and wet electrodes over a period of 6 hours.

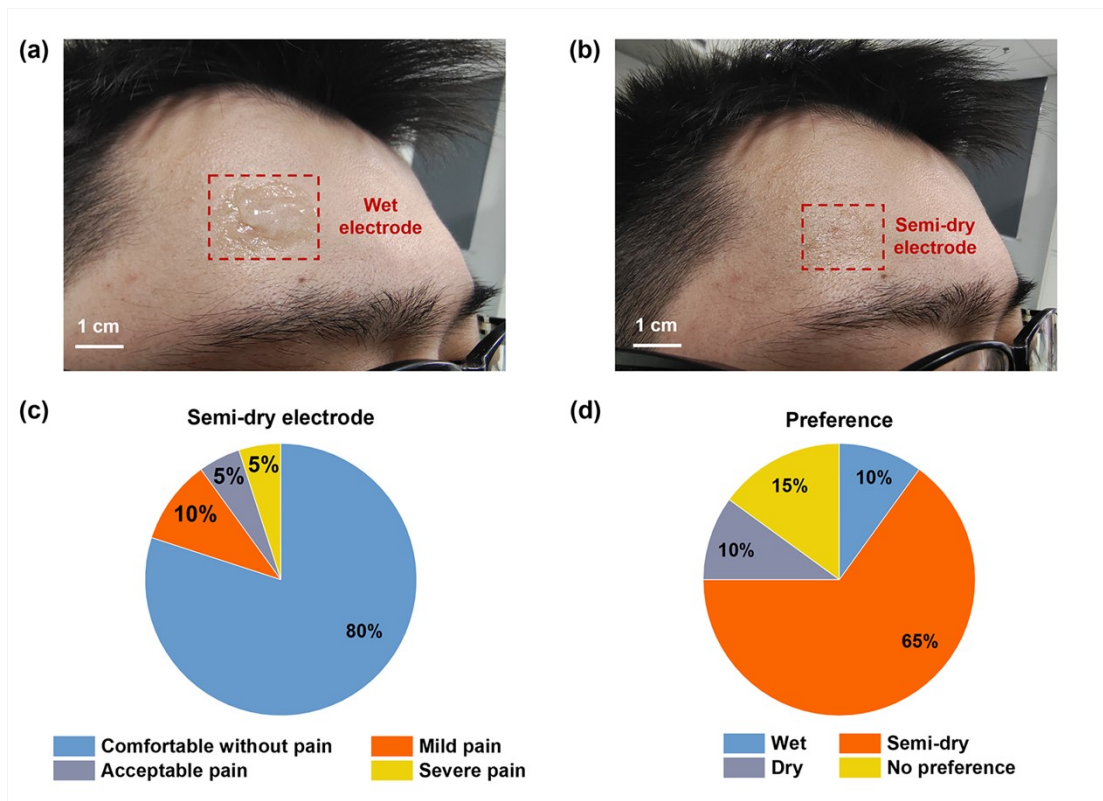

**Figure S15.** The skin states after experiments of (a) the wet electrode and (b) the semi-dry electrode. (c) Comfort assessment of this semi-dry electrode by different volunteers. (d) Preferences of volunteers for the three types of electrodes.

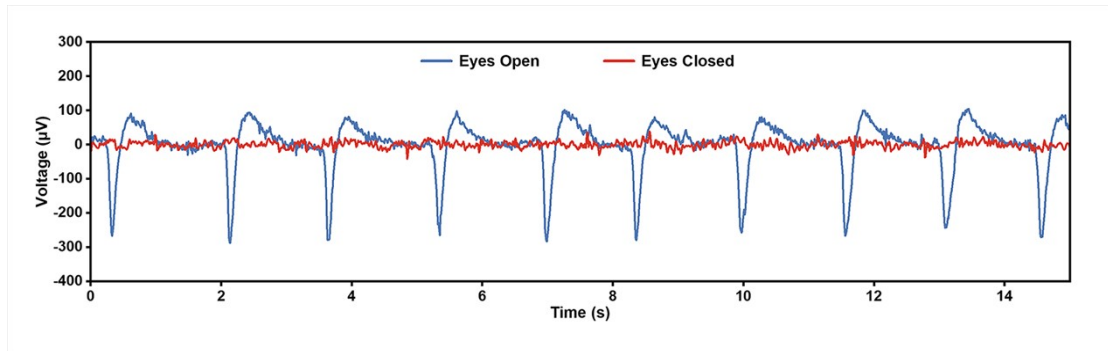

**Figure S16.** One channel EEG signal recorded by the wet electrode during eyes open and eyes closed.



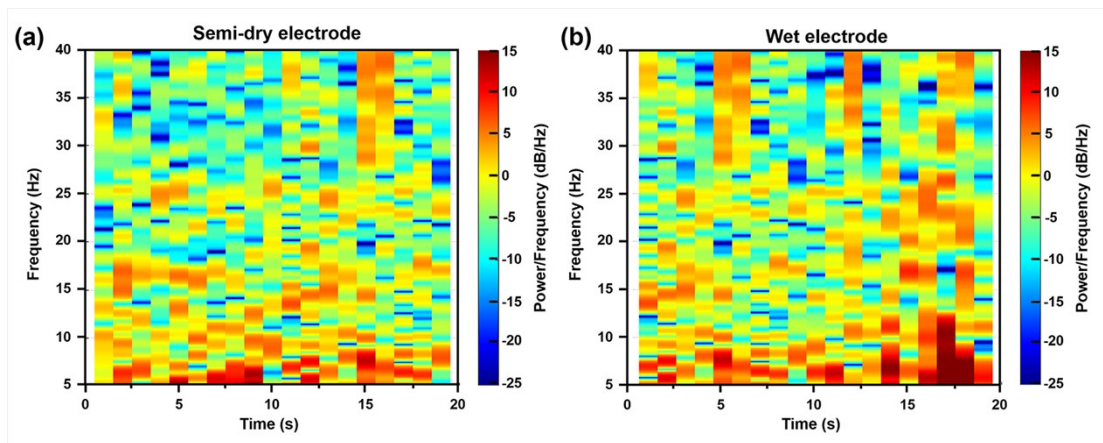

**Figure S17.** Time-frequency analysis of 0.5-40 Hz signals recorded by (f) the semi-dry electrode and (g) wet electrode with eyes open.

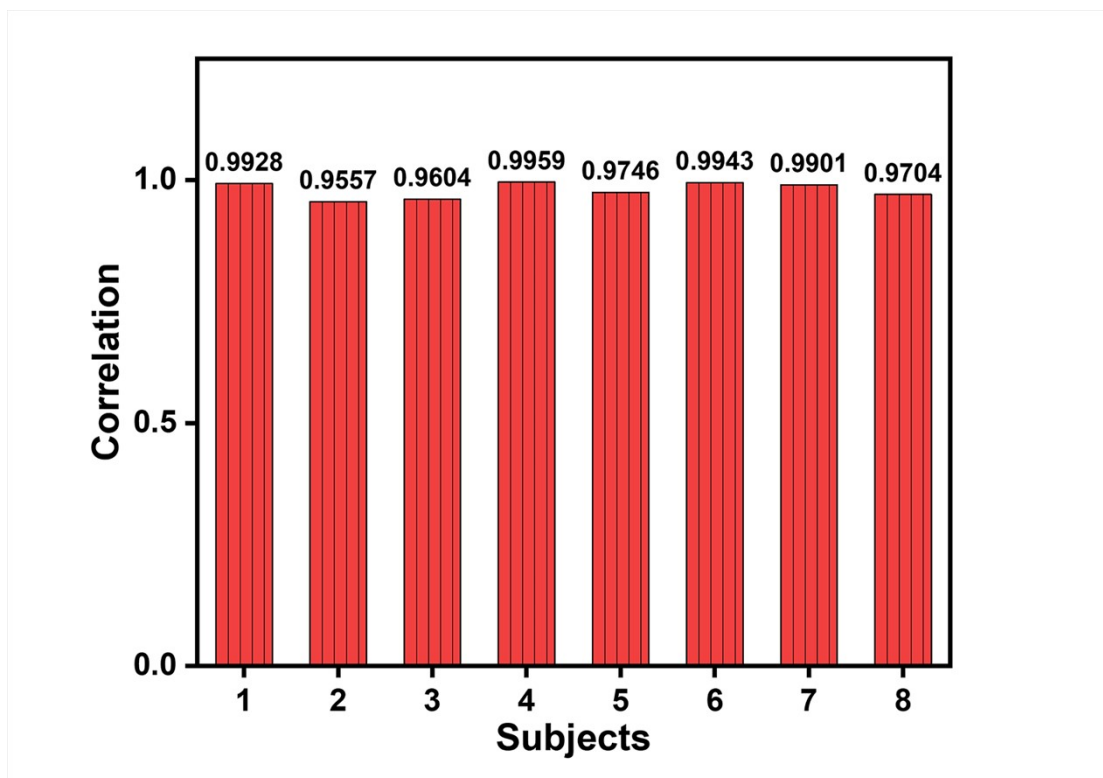

**Figure S18.** The spectral correlation of signals recorded by the semi-dry electrode and wet electrode.

## Supporting Tables

**Table S1:** Synthesis of PNIPAM hydrogel and PNIPAM/PVA hydrogels by varying the mass concentration of PVA solution.

| Hydrogels | PVA<br>(g) | NIPAM<br>(g) | BIS<br>(g) | TEMED<br>( $\mu$ L) | APS<br>(g) | H <sub>2</sub> O<br>(mL) |
|-----------|------------|--------------|------------|---------------------|------------|--------------------------|
| 0% PVA    | 0          | 2.0          | 0.02       | 50                  | 0.016      | 12.4                     |
| 1% PVA    | 0.1        | 1.9          | 0.02       | 50                  | 0.016      | 12.4                     |
| 2% PVA    | 0.2        | 1.8          | 0.02       | 50                  | 0.016      | 12.4                     |
| 3% PVA    | 0.3        | 1.7          | 0.02       | 50                  | 0.016      | 12.4                     |
| 4% PVA    | 0.4        | 1.6          | 0.02       | 50                  | 0.016      | 12.4                     |

**Table S2:** The fitting results of equivalent circuit components.

| Parameters    | $R_{ct}$ | $CPE_e - T$             | $CPE_e - P$ | $R_e$            | $R_s$            | $CPE_s - T$             | $CPE_s - P$        | $R_{sub}$ |
|---------------|----------|-------------------------|-------------|------------------|------------------|-------------------------|--------------------|-----------|
| ANLS-PPH      | 3794     | $2.8023 \times 10^{-4}$ | 0.86629     | $\frac{65.8}{3}$ | 7220             | $1.2574 \times 10^{-4}$ | $\frac{0.7632}{9}$ | 105.8     |
| ANLS-Blank    | 6303     | $2.3381 \times 10^{-4}$ | 0.86701     | $\frac{78.1}{6}$ | $\frac{1243}{2}$ | $7.8473 \times 10^{-4}$ | $\frac{0.7980}{2}$ | 105.5     |
| Wet electrode | 1044     | $6.8866 \times 10^{-4}$ | 0.81644     | 5.64             | 3267             | $1.8034 \times 10^{-4}$ | $\frac{0.8403}{3}$ | 104.3     |

**Table S3:** Comparisons of representative electrodes.

| Materials                                                | Electrode types | Application | Comfort level                                             | Long-term durability                            | Ways to release electrolyte                                | Contact impedance (10 Hz)    | Reference |
|----------------------------------------------------------|-----------------|-------------|-----------------------------------------------------------|-------------------------------------------------|------------------------------------------------------------|------------------------------|-----------|
| Conductive metals                                        | Dry             | ECG/EMG/EEG | Hard and potentially skin-damaging                        | -                                               | Sweating                                                   | > 100 k $\Omega$             | -         |
| Conductive paste                                         | Wet             | ECG/EMG/EEG | Highly comfortable but foreign body sensation on the skin | -                                               | -                                                          | < 5 k $\Omega$               | -         |
| Ag/AgCl coated PU; saline                                | Semi-dry        | EEG         | -                                                         | -                                               | Pressure                                                   | -                            | 1         |
| PU sponge; electrolyte fluid                             | Semi-dry        | EEG         | Better than dry electrode                                 | 8 h (< 20 k $\Omega$ )                          | Pressure                                                   | 10 k $\Omega$ ~35 k $\Omega$ | 2         |
| Porous ceramics; saline                                  | Semi-dry        | EEG         | Pain (3 subjects); slight pain (17 subjects)              | -                                               | Capillary force                                            | < 30 k $\Omega$              | 3         |
| Porous ceramics; saline                                  | Semi-dry        | EEG         | -                                                         | Approximately 20 k $\Omega$ increase up to 8 h. | Capillary force                                            | 21.1 $\pm$ 8.2 k $\Omega$ ~  | 4         |
| Carrageenan; Glycerin; conductive salt                   | Semi-dry        | EEG         | 70% of subjects felt comfortable without pain.            | 4 h (< 76 k $\Omega$ )                          | Auto-release (uncontrollable)                              | 43 $\pm$ 6 k $\Omega$        | 5         |
| PAM/PVA hydrogel; saline                                 | Semi-dry        | ECG/EEG     | -                                                         | 8 h (< 38.2 $\pm$ 5.6)                          | Auto-release (uncontrollable)                              | 36.4 $\pm$ 16.8 k $\Omega$   | 6         |
| PDMS; Ag nanoparticle-loaded sponge; PNIPAM/PVA hydrogel | Semi-dry        | ECG/EEG     | 80% of subjects felt comfortable without pain.            | 6 h (< 10 k $\Omega$ )                          | Body temperature response (smart electrolyte-replenishing) | 8 k $\Omega$ ~18 k $\Omega$  | This work |

## References

1. A. R. Mota, L. Duarte, D. Rodrigues, A. C. Martins, A. V. Machado, F. Vaz, P. Fiedler, J. Haueisen, J. M. Nóbrega and C. Fonseca, *Sens. Actuators, A*, 2013, **199**, 310-317.
2. X. Xing, W. H. Pei, Y. J. Wang, X. H. Guo, H. Zhang, Y. X. Xie, Q. Gui, F. Wang and H. D. Chen, *Sens. Actuators, A*, 2018, **270**, 262-270.
3. F. Wang, G. L. Li, J. J. Chen, Y. W. Duan and D. Zhang, *J. Neural Eng.*, 2016, **13**, 046021.
4. G. L. Li, D. Zhang, S. Z. Wang and Y. W. Y. Duan, *Sens. Actuators, B*, 2016, **237**, 167-178.
5. W. H. Pei, X. T. Wu, X. Zhang, A. H. Zha, S. Tian, Y. J. Wang and X. R. Gao, *IEEE Trans. Neural Syst. Rehabil. Eng.*, 2022, **30**, 843-850.
6. G. L. Li, Y. Liu, Y. W. Chen, Y. H. Xia, X. M. Qi, X. Wan, Y. Jin, J. Liu, Q. G. He, K. H. Li and J. X. Tang, *Smartmat*, 2023, **5**, e1173.
